# Supplementary material for: 3′,8″-Dimerization Enhances the Antioxidant Capacity of Flavonoids: Evidence from Acacetin and Isoginkgetin
Source: MDPI journal article supplement (doi:10.3390/molecules24112039), 2019-05-28
Supplement: s1 [file s1]

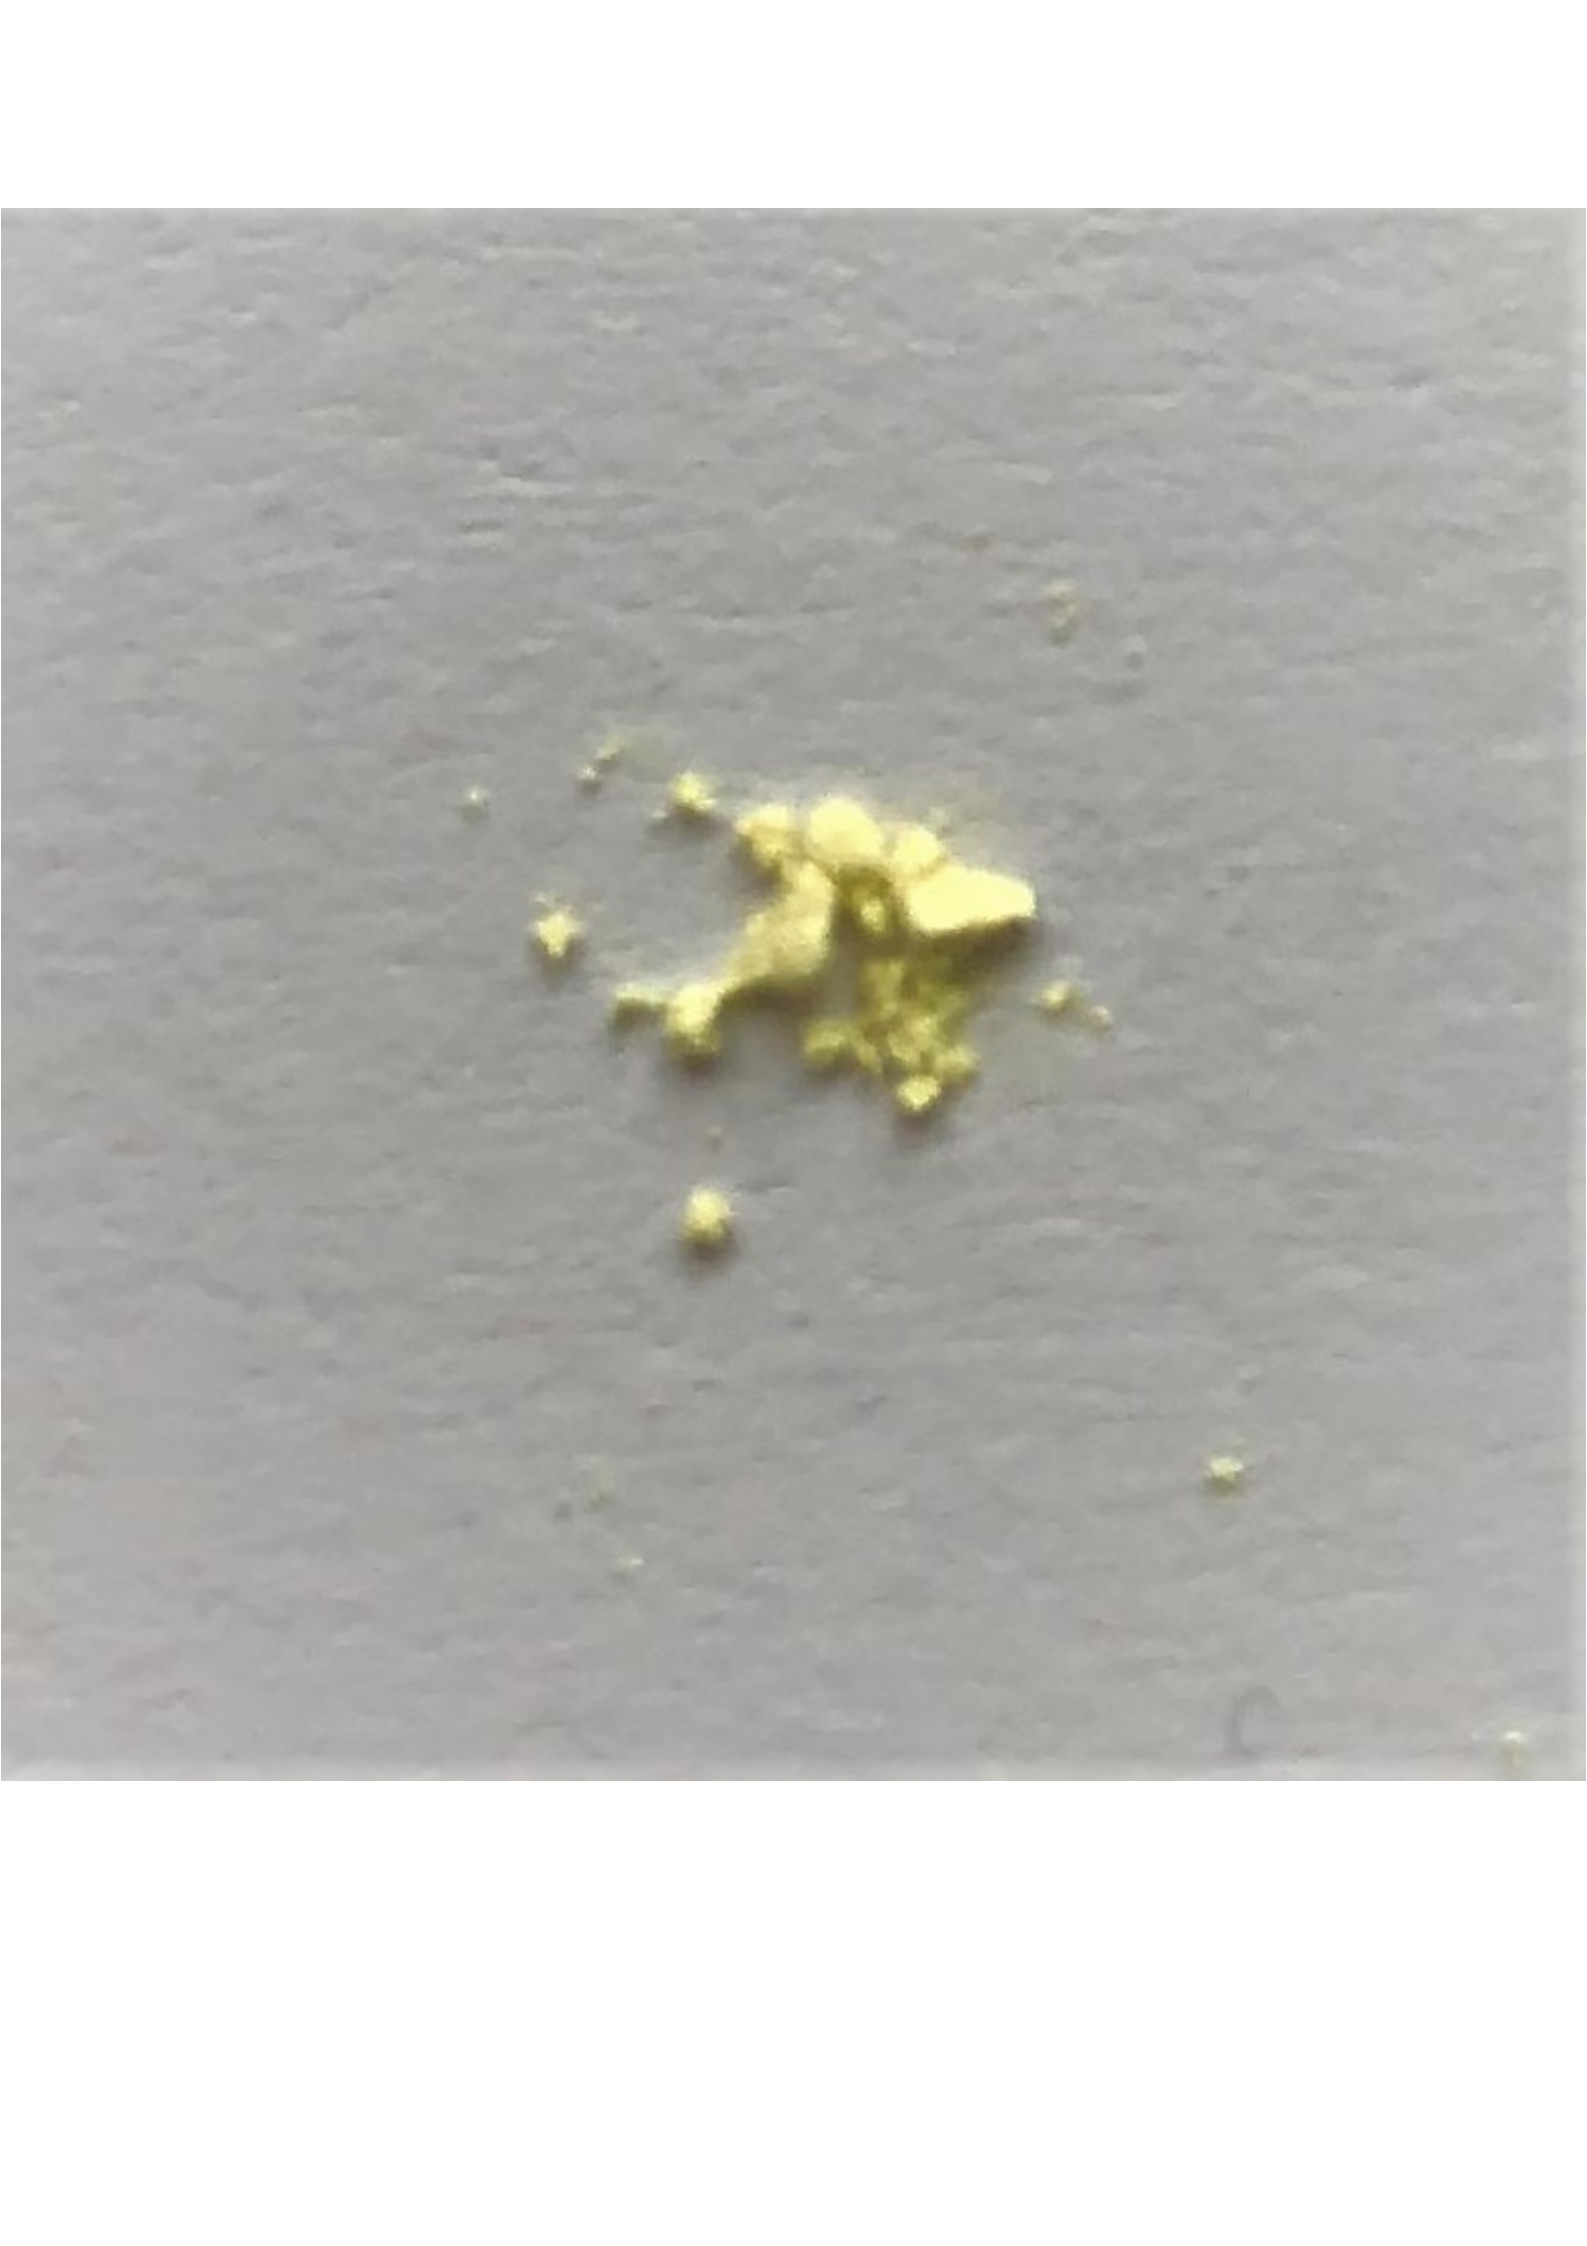

产品分析证书  
Certificate of Analysis

中文名称: 异银杏素

English Name: Isoginkgetin

别名 (Alias):

产品编码 (Cat. No.): BP0784

CAS Number: 548-19-6

分子式 (M. F.): C<sub>32</sub>H<sub>22</sub>O<sub>10</sub>

分子量 (M. W.): 566.518

批号 (Batch No.): PRF8060645

报告日期 (Report date): 2017-06-06

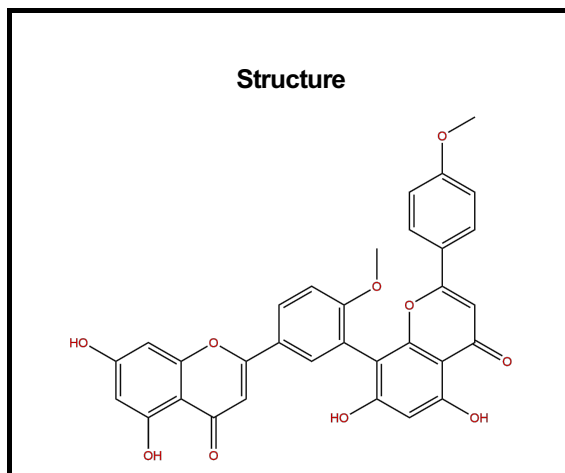

检验结果 (Analytical result):

| 检验项目 (Test Item)             | 检验指标 (Specifications)     | 检验结果 (Results)      |
|------------------------------|---------------------------|---------------------|
| 外观 Appearance                | Light yellow powder       | Light yellow powder |
| 干燥失重 Loss on drying          | <3.0%                     | 1.62%               |
| 纯度 Purity (HPLC-DAD, 330nm)* | ≥98.0%                    | 98.80%              |
| 质谱 Mass                      | 566.5±1                   | Conforms            |
| 核磁 NMR                       | Comply with the structure | Conforms            |

\* 色谱图见附件 (Please find HPLC chromatography attached.)

检测方法 (Test Method): Column: Thermo BDS Hypersil C18, 4.6\*100mm, 2.4um; Column temperature: 30°C; Detection Mode:

UV330nm; Flow Rate: 1.0ml/min; Sample dissolution: DMF dissolved and diluted with methanol; Mobile Phase: A, 0.1% phosphoric acid in water B,

Acetonitrile; Gradient elution: B, 35%-45%, 0min-15min; 45%-45%, 15min-35min.

贮存条件 (Storage): 2-8°C, protected from light, keep package airproofed when not in use.

复测期 (Retest date): two years (2019-06-05) under conditions list above.

QC: Zhang Ling

Date: 2017-06-06

QA: Wu Qi

Date: 2017-06-06

备注 (Remarks): The sample solutions should be prepared and used immediately. It is the best preparing the solutions immediately before use. If the solutions have to be made up in advance, it should be made as aliquots in tightly sealed vials at less than -20°C. Generally, these might be useable for up to two weeks.  
In case of quality issue, please contact us within 15 days after receipt of the product.

Tel: +86-28-82633397 Fax: +86-28-82633165

http://www.phytopurify.com Email: sales@biopurify.com biopurify@gmail.com

# SAMPLE INFORMATION

|                   |                         |                     |              |
|-------------------|-------------------------|---------------------|--------------|
| Sample Name:      | Isoginkgetin PRF8060645 | Acquired By:        | System       |
| Sample Type:      | Standard                | Sample Set Name:    |              |
| Vial:             | 8                       | Acq. Method Set:    | Isoginkgetin |
| Injection #:      | 1                       | Processing Method:  | Samples      |
| Injection Volume: | 10.00 ul                | Channel Name:       | 330.0nm      |
| Run Time:         | 30.0 Minutes            | Proc. Chnl. Descr.: | PDA 330.0 nm |
| Date Acquired:    | 2017-6-6 14:29:37 CST   |                     |              |
| Date Processed:   | 2017-6-6 15:09:48 CST   |                     |              |

## Auto-Scaled Chromatogram

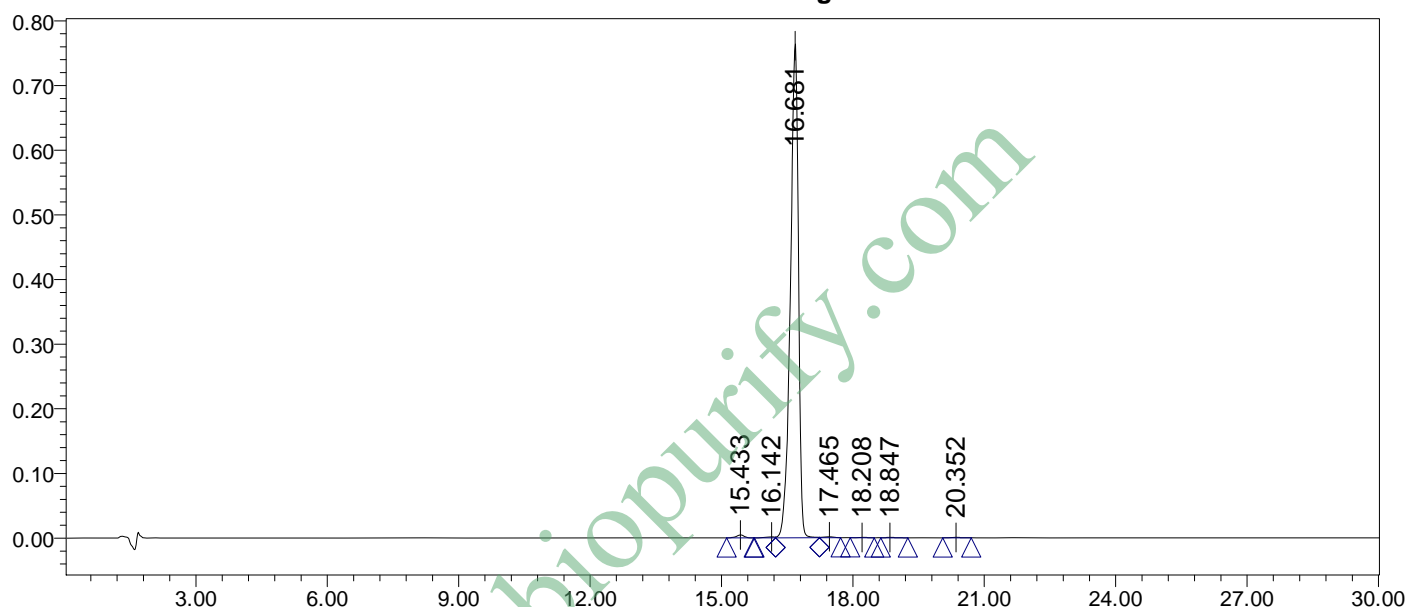

## Peak Results

|   | RT     | Area    | % Area | USP Plate Count | USP Resolution |
|---|--------|---------|--------|-----------------|----------------|
| 1 | 15.433 | 53200   | 0.54   | 39599.70        |                |
| 2 | 16.142 | 20696   | 0.21   |                 |                |
| 3 | 16.681 | 9718385 | 98.80  | 40269.50        |                |
| 4 | 17.465 | 22853   | 0.23   | 31119.85        | 1.81           |
| 5 | 18.208 | 6101    | 0.06   | 42582.02        | 1.69           |
| 6 | 18.847 | 8062    | 0.08   | 48479.38        | 1.78           |
| 7 | 20.352 | 7264    | 0.07   | 42064.64        | 4.05           |
