# Supplementary material for: 3′,8″-Dimerization Enhances the Antioxidant Capacity of Flavonoids: Evidence from Acacetin and Isoginkgetin
Source: MDPI journal article supplement (doi:10.3390/molecules24112039), 2019-05-28
Supplement: s1 [file s1]

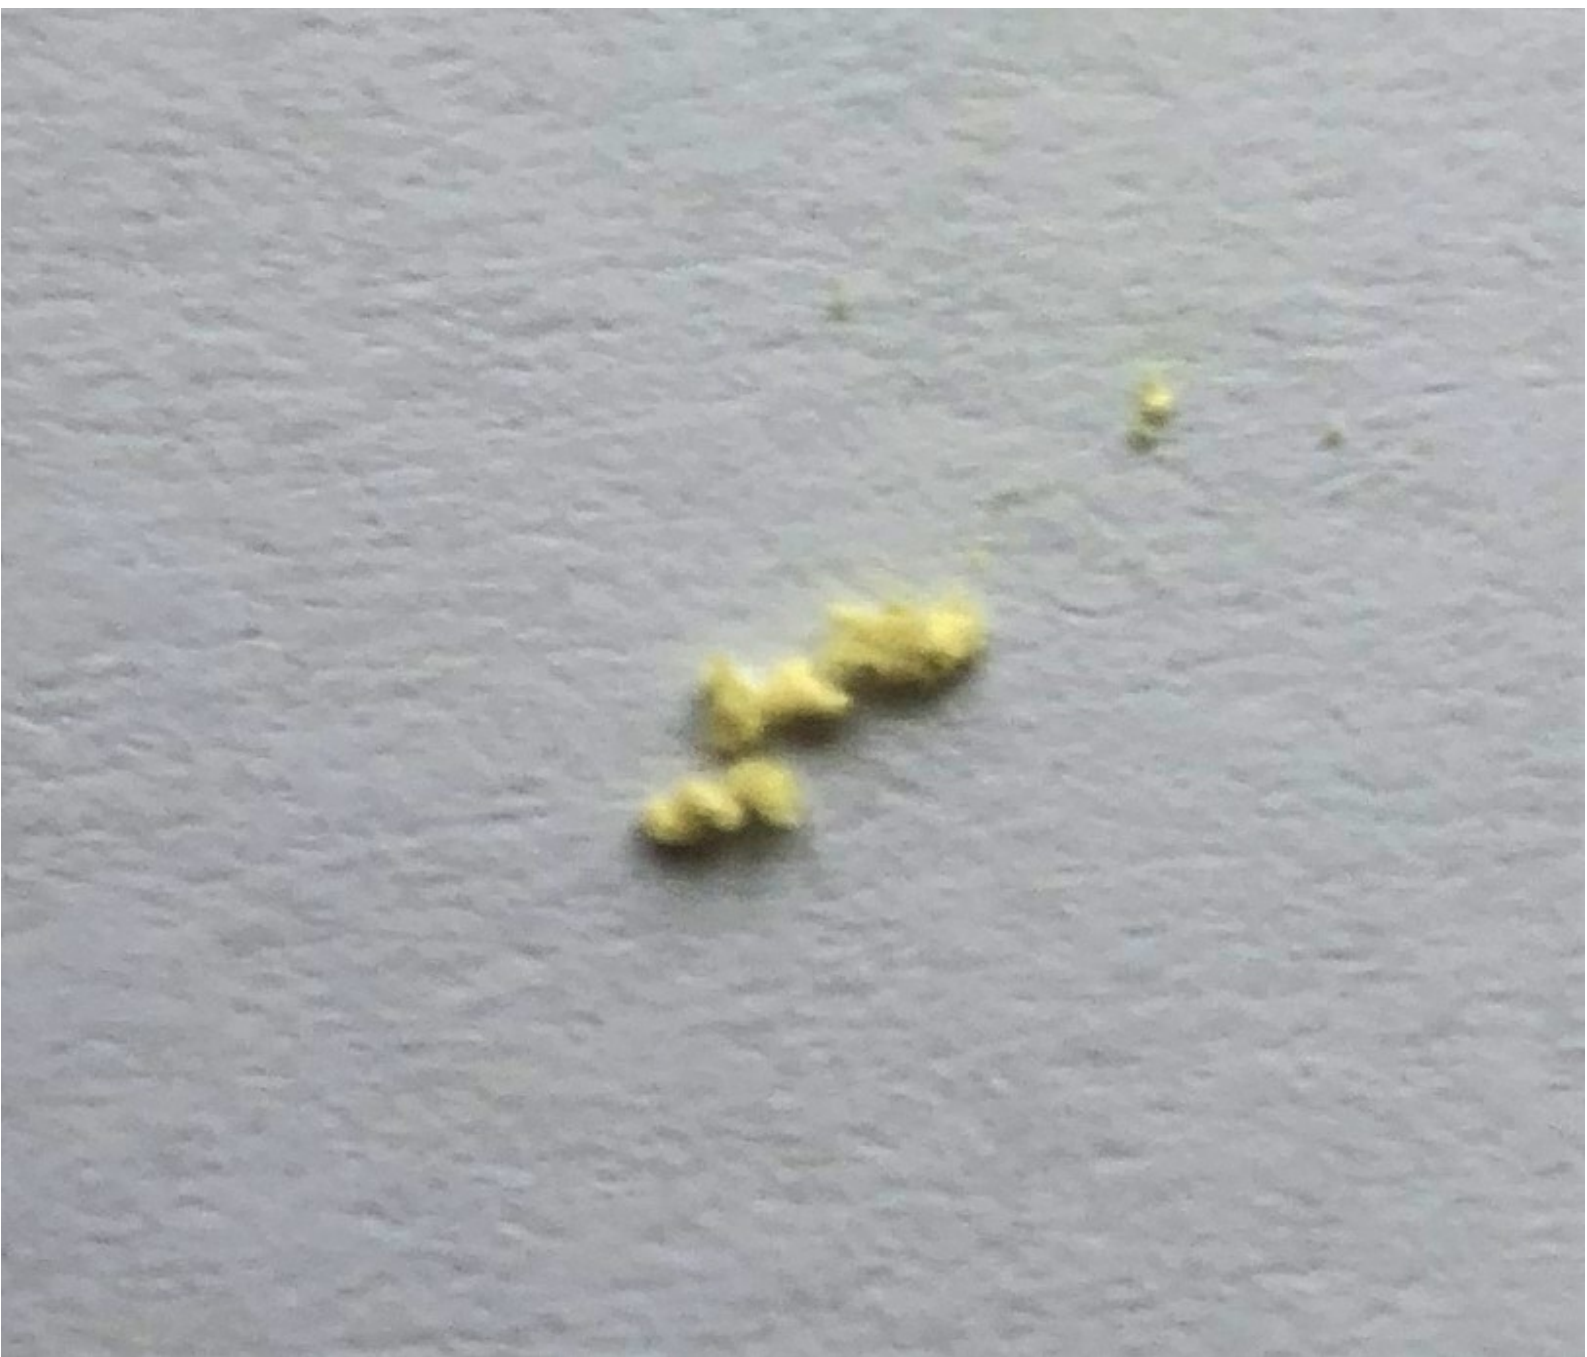

产品分析证书  
Certificate of Analysis

中文名称: 金合欢素

English Name: Acacetin

别名 (Alias): Apigenin 4'-methyl ether; Linarigenin;  
Buddleoflavanol

产品编码 (Cat. No.): BP0114

CAS Number: 480-44-4

分子式 (M. F.): C<sub>16</sub>H<sub>12</sub>O<sub>5</sub>

分子量 (M. W.): 284.267

批号 (Batch No.): PRF8041842

报告日期 (Report date): 2017-04-18

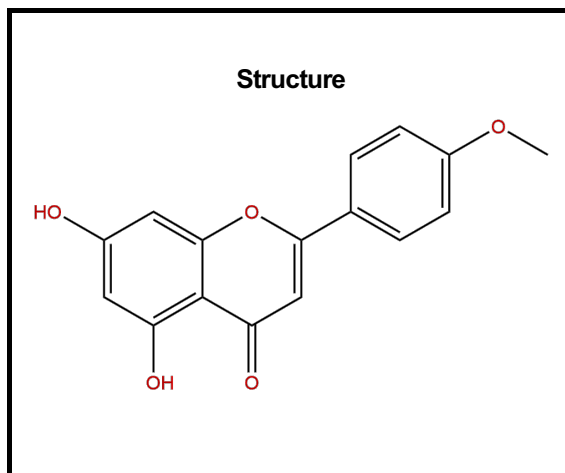

检验结果 (Analytical result):

| 检验项目 (Test Item)             | 检验指标 (Specifications)     | 检验结果 (Results)    |
|------------------------------|---------------------------|-------------------|
| 外观 Appearance                | Light pink powder         | Light pink powder |
| 干燥失重 Loss on drying          | <3.0%                     | 1.53%             |
| 纯度 Purity (HPLC-DAD, 335nm)* | ≥98.0%                    | 98.67%            |
| 质谱 Mass                      | 284.2±1                   | Conforms          |
| 核磁 NMR                       | Comply with the structure | Conforms          |

\* 色谱图见附件 (Please find HPLC chromatography attached.)

检测方法 (Test Method): Column: Thermo Hypersil GOLD AQ C18, 4.6\*250mm, 5.0um; Column temperature: 30°C; Detection Mode:

UV335nm; Flow Rate: 1.0ml/min; Sample dissolution: Methanol; Mobile Phase: A, 0.1% Phosphoric acid in water B, Acetonitrile; Gradient elution: B, 35%-

50%, 15min.

贮存条件 (Storage): 2-8°C, protected from light, keep package airproofed when not in use.

复测期 (Retest date): two years (2019-04-17) under conditions list above.

QC: Zhang Ling

Date: 2017-04-18

QA: Wu Qi

Date: 2017-04-18

备注 (Remarks): The sample solutions should be prepared and used on the day of receipt. It is the best preparing the solutions immediately before use. If the solutions have to be made up in advance, it should be made as aliquots in tightly sealed vials at less than -20°C. Generally, these might be useable for up to two weeks.  
In case of quality issue, please contact us within 15 days after receipt of the product.

Tel: +86-28-82633397 Fax: +86-28-82633165

http://www.phytopurify.com Email: sales@biopurify.com biopurify@gmail.com

=====  
操作者 : DYZG ZHI BEI  
仪器 : 仪器 1 位置 : 样品瓶 1  
进样日期 : 2017-4-18 13:02:08  
进样量 : 10.0 µl  
采集方法 : C:\QC\ACACETIN.M  
最后修改 : 2017-4-18 12:53:58 : DYZG ZHI BEI  
分析方法 : C:\QC\ACACETIN.M  
最后修改 : 2017-4-18 13:52:14 : DYZG ZHI BEI  
(调用后修改)

附加信息: 峰已手动积分

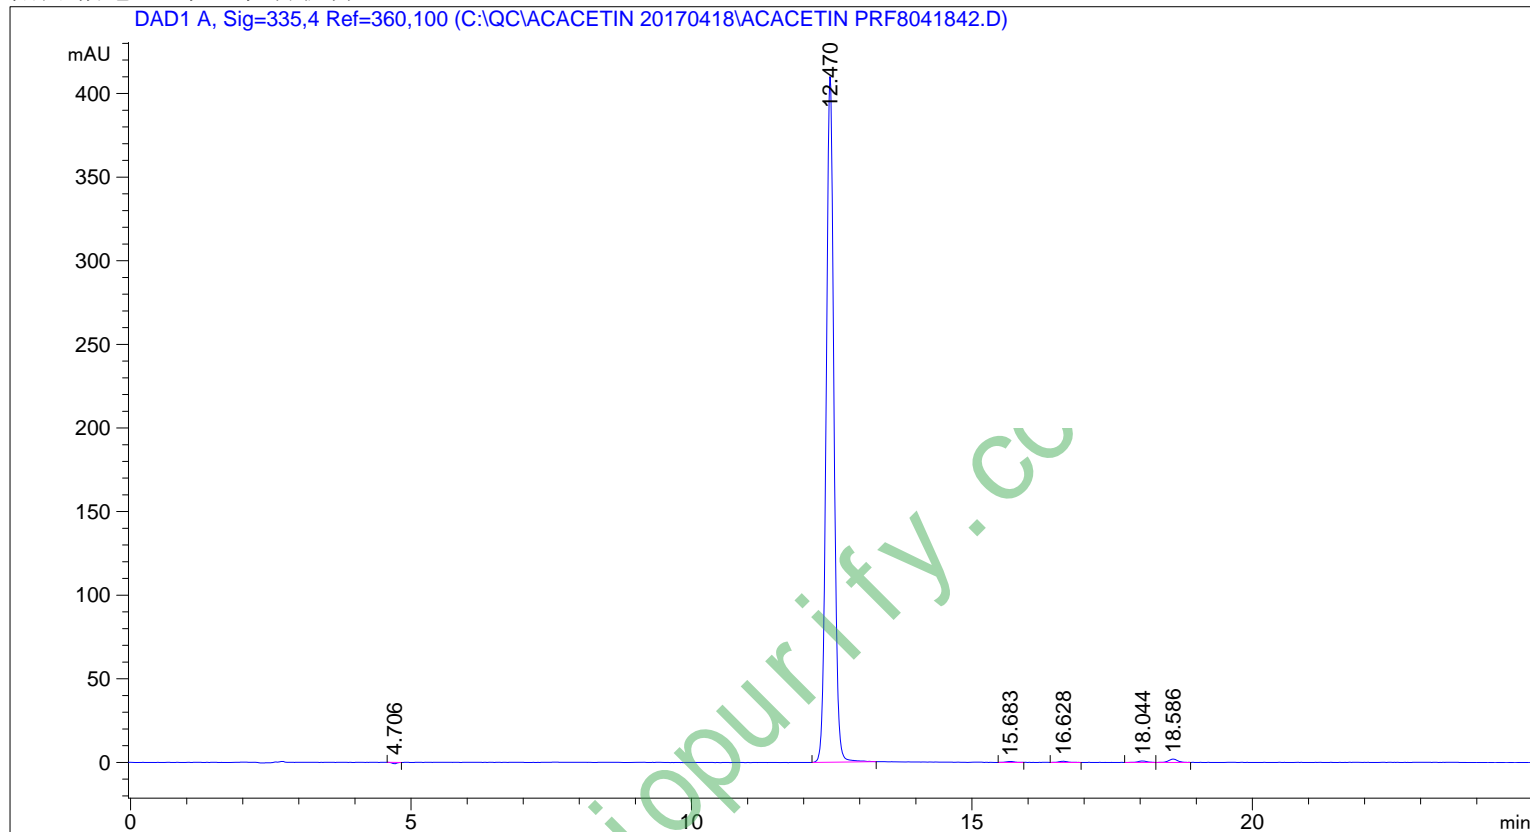

=====  
面积百分比报告  
=====

排序 : 信号  
乘积因子: 1.0000  
稀释因子: 1.0000  
内标使用乘积因子和稀释因子

信号 1: DAD1 A, Sig=335,4 Ref=360,100

| 峰 # | 保留时间 [min] | 类型   | 峰宽 [min] | 峰面积 [mAU*s] | 峰高 [mAU]   | 峰面积 %   |
|-----|------------|------|----------|-------------|------------|---------|
| 1   | 4.706      | MM R | 0.0905   | 4.80431     | 8.12578e-1 | 0.1215  |
| 2   | 12.470     | BV   | 0.1469   | 3901.06104  | 410.29437  | 98.6790 |
| 3   | 15.683     | BV   | 0.1576   | 5.99660     | 5.39829e-1 | 0.1517  |
| 4   | 16.628     | BB   | 0.1498   | 7.79535     | 7.11671e-1 | 0.1972  |
| 5   | 18.044     | BV   | 0.1523   | 10.51488    | 8.87313e-1 | 0.2660  |
| 6   | 18.586     | VV   | 0.1720   | 23.11108    | 2.01237    | 0.5846  |

总量 : 3953.28325 415.25813

=====  
\*\*\* 报告结束 \*\*\*
