# Supplementary material for: 3′,8″-Dimerization Enhances the Antioxidant Capacity of Flavonoids: Evidence from Acacetin and Isoginkgetin
Source: MDPI journal article supplement (doi:10.3390/molecules24112039), 2019-05-28
Supplement: s1 [file s1]

### Suppl. 3 Dose response curves

## 3',8"-Dimerization Enhances the Antioxidant Capacity of Flavonoids: Evidence from Acacetin and Isoginkgetin

Xican Li <sup>1,2,\*</sup>, Xiaojian Ouyang <sup>1,2</sup>, Rongxin Cai <sup>1,2</sup>, and Dongfeng Chen <sup>3,4,\*</sup>

- 1 School of Chinese Herbal Medicine, Guangzhou University of Chinese Medicine, Waihuan East Road No. 232, Guangzhou Higher Education Mega Center, Guangzhou 510006, China; oyxiaojian55@163.com (X.O.); choi\_roy@foxmail.com (R.C.)
- 2 Innovative Research & Development Laboratory of TCM, Guangzhou University of Chinese Medicine, Waihuan East Road No. 232, Guangzhou Higher Education Mega Center, Guangzhou 510006, China;
- 3 School of Basic Medical Science & Research Center of Basic Integrative Medicine, Guangzhou University of Chinese Medicine, Guangzhou 510006, China; chen888@gzucm.edu.cn (D.C.)
- 4 The Research Center of Basic Integrative Medicine, Guangzhou University of Chinese Medicine, Guangzhou 510006, China.

#### 1. Superoxide anion ( $\bullet\text{O}_2^-$ ) scavenging assay

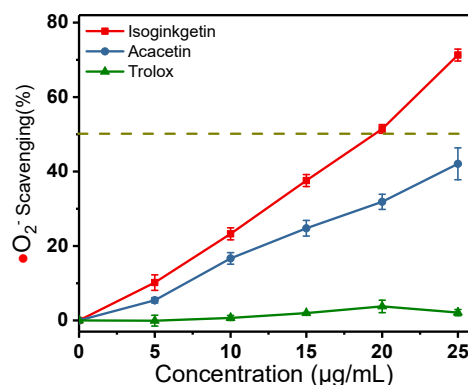

Figure S3.1: The dose response curves of acacetin and isoginkgetin in  $\bullet\text{O}_2^-$ -inhibition assay. Each value is expressed as mean  $\pm$  SD (n = 3).

Tab. S1 The comparison of  $\text{IC}_{50}$  values of acacetin, isoginkgetin and positive control in  $\bullet\text{O}_2^-$  scavenging assay.

|              | Mean $\pm$ SD<br>$\mu\text{g/mL}$ | Mean $\pm$ SD<br>$\mu\text{M}$ |
|--------------|-----------------------------------|--------------------------------|
| isoginkgetin | 18.7 $\pm$ 0.2                    | 33.1 $\pm$ 0.4 <sup>a</sup>    |
| acacetin     | 30.5 $\pm$ 3.2                    | 107.1 $\pm$ 11.3 <sup>b</sup>  |
| Trolox       | 1243.6 $\pm$ 39.5                 | 4968.4 $\pm$ 157.9             |

The  $\text{IC}_{50}$  value was defined as the lowest concentration with 50% radical inhibition or relative reducing power, calculated by linear regression analysis, and expressed as the mean  $\pm$  SD (n = 3). The linear regression was analyzed by Origin 6.0 professional software. The  $\text{IC}_{50}$  values with different superscripts (a and b) between acacetin and isoginkgetin are significantly different ( $p < 0.05$ ). Trolox was the positive control.

## 2. $\text{Cu}^{2+}$ -reducing power assay

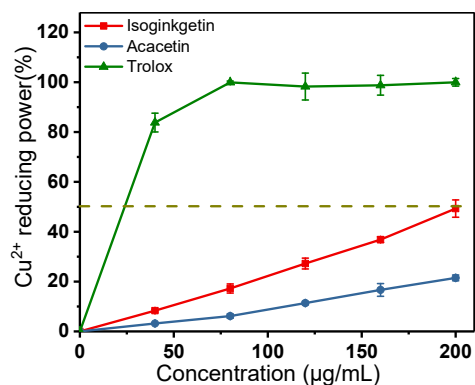

**Figure S3.2:** The dose response curves of acacetin and isoginkgetin in  $\text{Cu}^{2+}$ -reducing power assay. Each value is expressed as mean  $\pm$  SD (n = 3).

**Tab. S2** The comparison of  $\text{IC}_{50}$  values of acacetin, isoginkgetin and positive control in  $\text{Cu}^{2+}$ -reducing power assay.

|              | Mean $\pm$ SD<br>$\mu\text{g/mL}$ | Mean $\pm$ SD<br>$\mu\text{M}$                |
|--------------|-----------------------------------|-----------------------------------------------|
| isoginkgetin | 207.9 $\pm$ 12.1                  | <u>367.1<math>\pm</math>21.4<sup>a</sup></u>  |
| acacetin     | 428.2 $\pm$ 9.5                   | <u>1506.2<math>\pm</math>33.4<sup>b</sup></u> |
| Trolox       | 9.5 $\pm$ 0.4                     | <u>38.1<math>\pm</math>1.7</u>                |

The  $\text{IC}_{50}$  value was defined as the lowest concentration with 50% radical inhibition or relative reducing power, calculated by linear regression analysis, and expressed as the mean  $\pm$  SD (n = 3). The linear regression was analyzed by Origin 6.0 professional software. The  $\text{IC}_{50}$  values with different superscripts (a and b) between acacetin and isoginkgetin are significantly different ( $p < 0.05$ ). Trolox was the positive control.

### 3. ABTS<sup>•+</sup>-scavenging assay

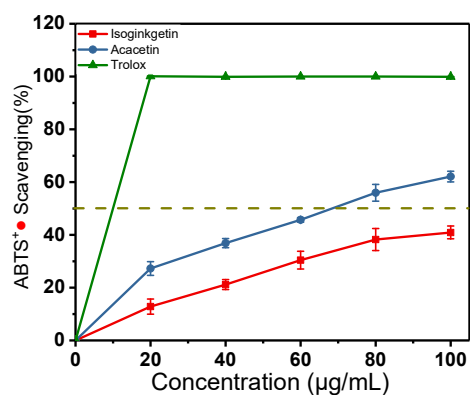

**Figure S3.3:** The dose response curves of acacetin and isoginkgetin in ABTS<sup>•+</sup>-scavenging assay. Each value is expressed as mean  $\pm$  SD (n = 3).

**Tab. S3** The comparison of IC<sub>50</sub> values of acacetin, isoginkgetin and positive control in ABTS<sup>•+</sup>-scavenging assay.

|              | Mean $\pm$ SD<br>$\mu$ g/mL | Mean $\pm$ SD<br>$\mu$ M                     |
|--------------|-----------------------------|----------------------------------------------|
| isoginkgetin | 118.6 $\pm$ 8.6             | <u>209.3<math>\pm</math>15.1<sup>a</sup></u> |
| acacetin     | 69.9 $\pm$ 3.4              | <u>246.2<math>\pm</math>11.8<sup>b</sup></u> |
| Trolox       | 5.7 $\pm$ 0.1               | <u>22.6<math>\pm</math>0.3</u>               |

The IC<sub>50</sub> value was defined as the lowest concentration with 50% radical inhibition or relative reducing power, calculated by linear regression analysis, and expressed as the mean  $\pm$  SD (n = 3). The linear regression was analyzed by Origin 6.0 professional software. The IC<sub>50</sub> values with different superscripts (a and b) between acacetin and isoginkgetin are significantly different (p < 0.05). Trolox was the positive control.
