# Supplementary material for: 3′,8″-Dimerization Enhances the Antioxidant Capacity of Flavonoids: Evidence from Acacetin and Isoginkgetin
Source: MDPI journal article supplement (doi:10.3390/molecules24112039), 2019-05-28
Supplement: s1 [file s1]

Suppl. 4 UV-vis spectra of ABTS<sup>•+</sup>

## 3',8"-Dimerization Enhances the Antioxidant Capacity of Flavonoids: Evidence from Acacetin and Isoginkgetin

Xican Li <sup>1,2,\*</sup>, Xiaojian Ouyang <sup>1,2</sup>, Rongxin Cai <sup>1,2</sup>, and Dongfeng Chen <sup>3,4,\*</sup>

- 1 School of Chinese Herbal Medicine, Guangzhou University of Chinese Medicine, Waihuan East Road No. 232, Guangzhou Higher Education Mega Center, Guangzhou 510006, China; oyxiaojian55@163.com (X.O.); choi\_roy@foxmail.com (R.C.)
- 2 Innovative Research & Development Laboratory of TCM, Guangzhou University of Chinese Medicine, Waihuan East Road No. 232, Guangzhou Higher Education Mega Center, Guangzhou 510006, China;
- 3 School of Basic Medical Science & Research Center of Basic Integrative Medicine, Guangzhou University of Chinese Medicine, Guangzhou 510006, China; chen888@gzucm.edu.cn (D.C.)
- 4 The Research Center of Basic Integrative Medicine, Guangzhou University of Chinese Medicine, Guangzhou 510006, China.

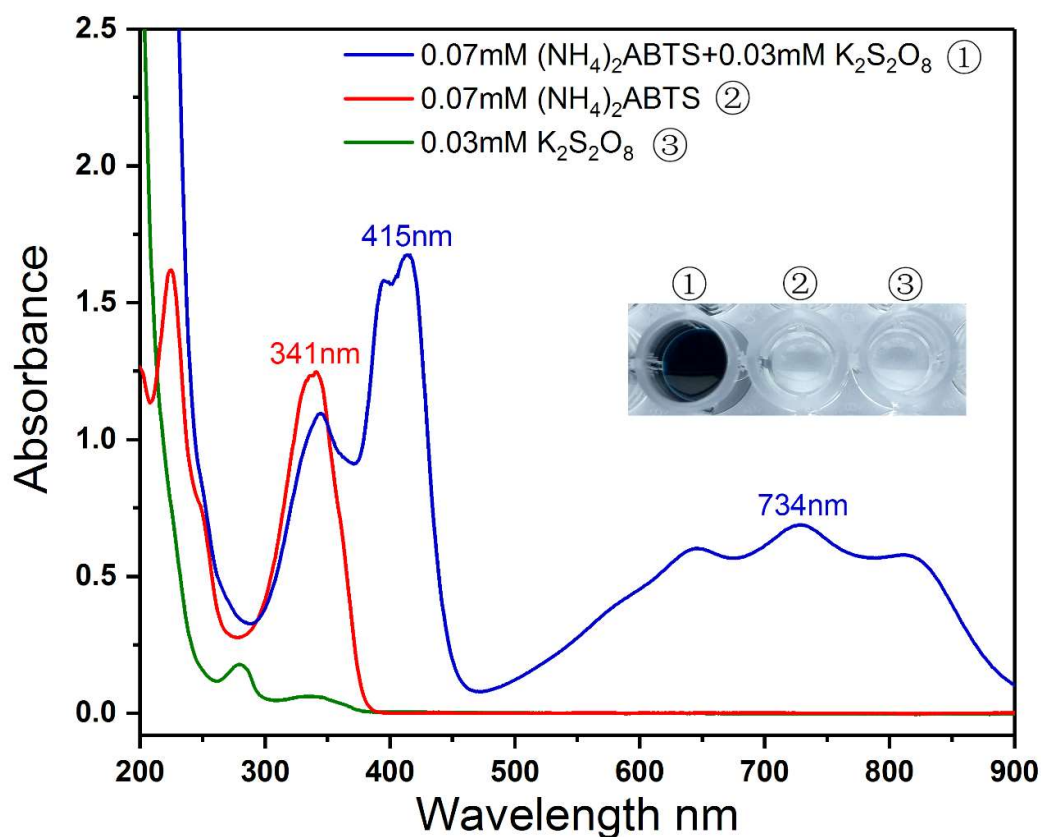

Fig. s4.1 UV-vis spectra of ABTS<sup>•+</sup>
